# Supplementary material for: Changes in dissolved organic matter and oxygen consumption in different bank filtration simulations at different scales
Source: Royal Society of Chemistry journal article supplement (doi:10.1039/d3ew00008g), 2023-01-01
Supplement: d3ew00008g1.pdf [file d3ew00008g1.pdf]

## Changes in dissolved organic matter and oxygen consumption in different bank filtration simulations at different scales

Muhammad Zeeshan<sup>a,b\*</sup>, Sondra Klitzke<sup>c</sup>, Aki Sebastian Ruhl<sup>a,b</sup>

<sup>a</sup> German Environment Agency, Section II 3.3, Schichauweg 58, 12307, Berlin, Germany

<sup>b</sup> Technische Universität Berlin, Water Treatment, KF4, Str. des 17. Juni 135, 10623, Berlin, Germany

<sup>c</sup> German Environment Agency, Section II 3.1, Schichauweg 58, 12307, Berlin, Germany

\* [muhammad.zeeshan@uba.de](mailto:muhammad.zeeshan@uba.de); [enr.m.zeeshan@live.com](mailto:enr.m.zeeshan@live.com)

### Supplementary Information

Table S1: Treated groundwater characteristics in the experiments with averages and standard deviations

| Parameter                                | MO columns      | SI and<br>LI columns |
|------------------------------------------|-----------------|----------------------|
| pH                                       | 7.6 – 8.2       | 8.0 – 8.3            |
| Conductivity ( $\mu\text{S}/\text{cm}$ ) | $1160 \pm 40$   | $789 \pm 7$          |
| DOC (mg/L)                               | $2.7 \pm 0.2$   | $3.0 \pm 0.1$        |
| UV <sub>254</sub> (1/m)                  | $5.2 \pm 0.4$   | $9.8 \pm 0.4$        |
| Dissolved oxygen                         | $7.8 \pm 0.4$   | $8.8 \pm 0.8$        |
| Nitrate (mg/L)                           | $0.20 \pm 0.05$ | $3.59 \pm 0.15$      |
| Ammonium (mg/L)                          | $0.02 \pm 0.01$ | $0.02 \pm 0.01$      |

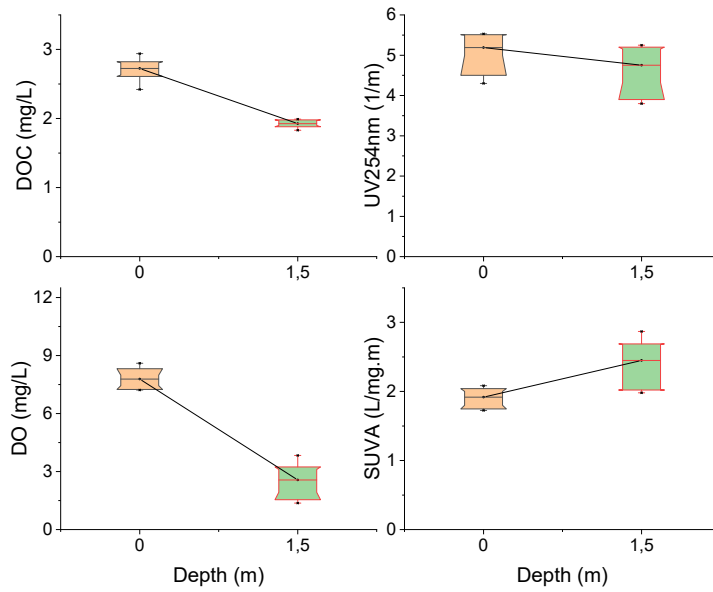

**Figure S1 Data variance and trend of different parameters in MO columns**

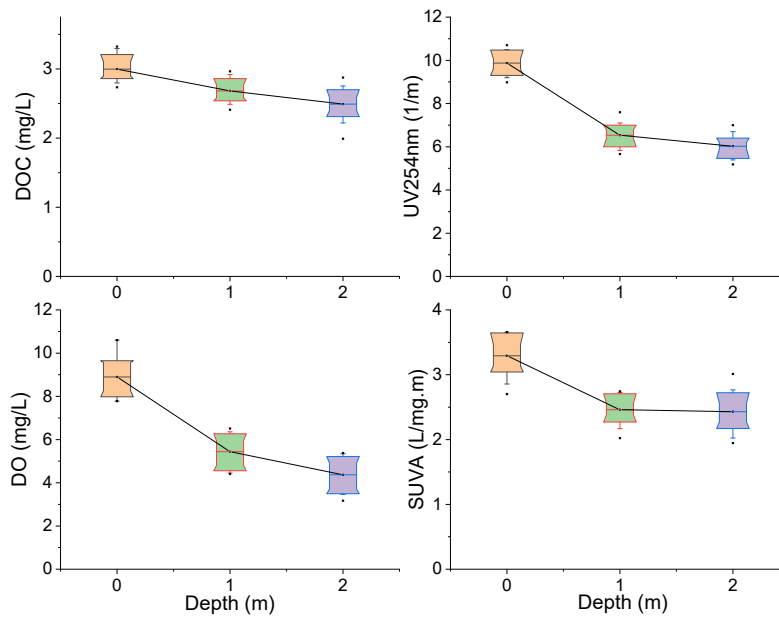

**Figure S2 Data variance and trend of different parameters in SI columns**

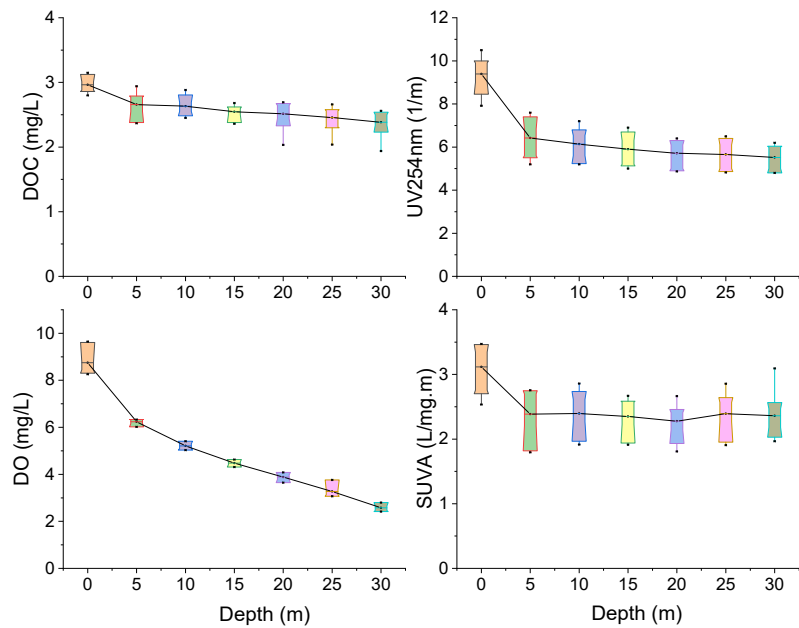

Figure S3 Data variance and trend of different parameters in LI columns

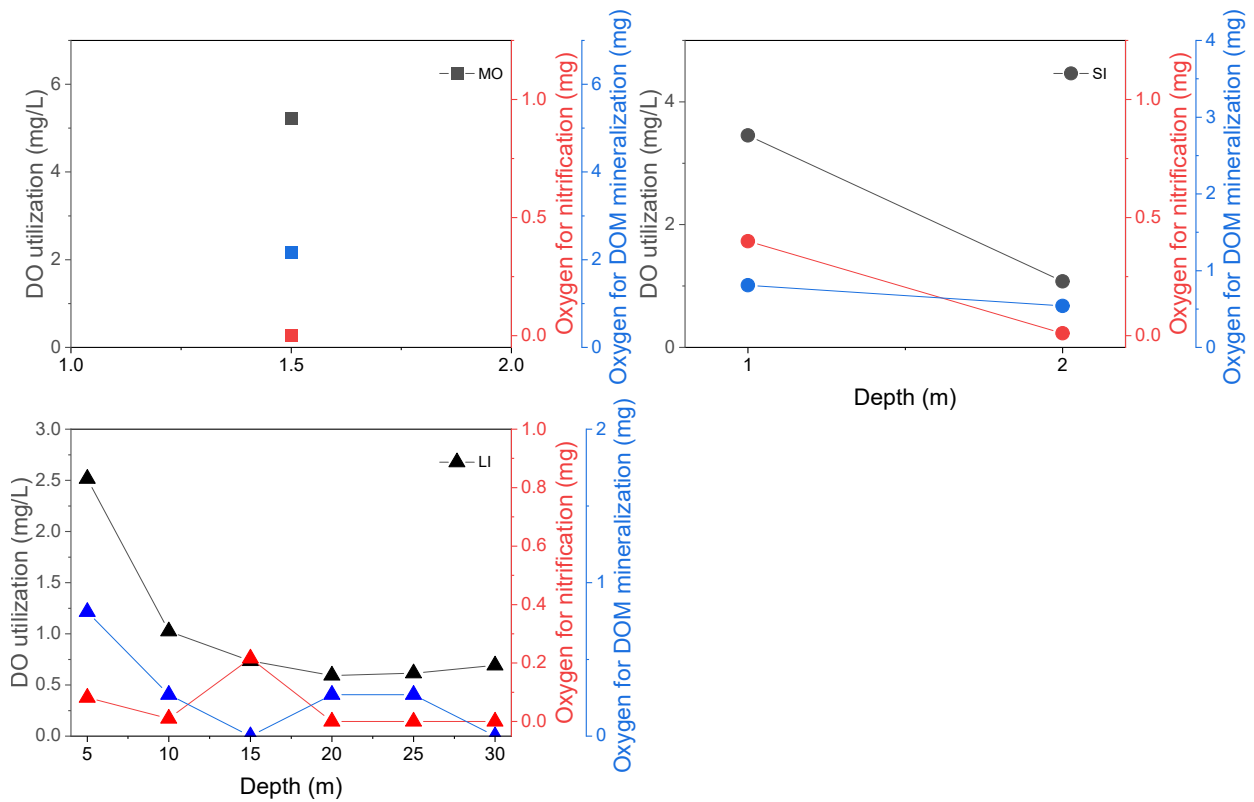

Figure S4 Averaged dissolved oxygen (DO) utilization and specific oxygen demand for DOM and nitrification in all systems.
